# Supplementary material for: Influence of plastic film mulch with biochar application on crop yield, evapotranspiration, and water use efficiency in northern China: A meta-analysis
Source: PeerJ. 2021 Mar 3;9:e10967. doi: 10.7717/peerj.10967 (PMC7936560; doi:10.7717/peerj.10967)
Supplement: Supplemental Information 2 [file peerj-09-10967-s002.xlsx]

## Sheet: Table 1
	Province	Study site	Cardinal point (N, E, m a.s.l)	Crop	Reference
	Gansu	Qingyang	(35°42’N, 107°20’E)	Wheat	Gao et al., 2014
		Tangjiabu, Dingxi	(35°57’N, 104°59’E, 1970 m a.s.l.)		Li et al., 2004
		Dingxi	(35°33’N, 104°35’E, 1896.7 m a.s.l.)	Potato	Zhao et al., 2012
			(35°33’N, 104°35’E, 1896.7 m a.s.l.)		Zhao et al., 2014
			(35°33’N, 104°35’E, 1874 m a.s.l.)		Qin et al., 2014
		Zhonglianchuan, Yuzhong	(36°02’N, 104°25’E, 2400 m a.s.l)		Zhou et al., 2015
			(36°02’N, 104°25’E, 2400 m a.s.l)		Liu and Siddique, 2015
			(36°2’N, 104°25’E, 2400 m a.s.l.)	Maize	Eldoma et al., 2016
			(36°02’N, 104°25’E, 2400 m a.s.l.)		Zhou et al., 2009
		Gaolan	(36°2’N, 103°7’E, 1780 m a.s.l.)	Potato	Wang et al., 2005
		Yuzhong	(35°9’N, 104°1’E, 1800 m a.s.l.)
	Ningxia	Pengyang	(35°51’N, 106°48’E, 1658 m a.s.l.)		Wu et al., 2017
			(106°45’N, 35°79’E, 1800 m a.s.l.)		Zhang et al., 2017
	Shaanxi	Changwu	(34°59′ N, 107°38′E, 1220 m)	Maize	Lu et al., 2020
			(35°14’N, 107°41’E, 1206 m a.s.l)		Zhang et al., 2011
			(35°14’N, 107°41’E, 1200 - 1206 m a.s.l.)		Lin et al., 2019
			35.288N, 107.888E; 1200m a.s.l.		Xiao et al., 2016
			35.28◦N,107.88◦E; 1200 m
			(35°14′ N, 107°42′E)		Qin et al., 2018
			(35°12′ N, 107°45′E, 12000 m a.s.l)	Wheat	He et al., 2016
		Heyang	(35°15’N, 110°18’E, 910 m a.s.l.)	Maize	Li et al., 2012
			(35°15’N, 110°18’E, 910 m a.s.l.)		Han et al., 2013
	Shanxi	Shouyang	(37°54′N, 113°09′E, 1273 m a.s.l.)		Gaimei et al., 2017
			(37°45’58”N, 113°12’9”E, 1202 m a.s.l.)		Gong et al., 2017
		Gaopu	38.2980 , 112 720E		Zhang et al., 2016

## Sheet: Table 2
		Items	Parameters	Categorical variable	n	Heterogeneity						Items	Parameters	Categorical variable	n	Heterogeneity
						df	P	Chi2	I2 (%)							df	P	Chi2	I2 (%)			Temperature
		Yield	Location	Gansu	22	9	1	0.68	0			Yield	Organc C content	<9	20	7	1	0.45	0
				Ningxia	5	1	0.37	0.82	0					>9	20	6	1	0.28	0
				Shaanxi	27	6	0.59	4.67	0				Bulk density	<1.3	25	7	0.97	1.78	0
				Shanxi	5	1	0.9	0.01	0					>1.3	25	8	0.9	3.43	0
			Crop type	Maize	39	12	0.2	15.72	24				pH	>7	30	10	0.97	3.51	0
				Wheat	7	1	0.79	0.07	0				Soil texture	Light	13	4	0.99	0.25	0
				Potato	14	5	0.99	0.44	0					Medium	10	4	0.99	0.32	0
			Rainfall	<400	18	7	1	0.55	0					Heavy	34	9	0.93	3.68	0
				>400	43	13	0.92	6.66	0				N	<50	9	3	0.99	0.09	0
			Temperature	<9	30	12	1	2.02	0					>50	16	5	0.96	1.04	0
				>9	29	7	0.69	4.78	0				P	<20	22	7	0.87	3.2	0
		ET	Location	Gansu	14	6	1	0.3	0					>20	12	3	0.78	1.11	0
				Ningxia	5	1	0.53	0.4	0				K	<150	23	6	0.76	3.4	0
				Shaanxi	10	2	0.71	0.68	0					>150	9	3	0.8	1.01	0
				Shanxi	6	1	0.35	0.87	0			ET	Organc C content	<9	13	5	0.99	0.48	0
			Crop type	Maize	23	7	0.88	3.05	0					>9	13	3	0.69	1.48	0
				Wheat	2	-	-	-	-				Bulk density	<1.3	14	5	1	0.33	0
				Potato	10	4	0.99	0.22	0					>1.3	17	5	0.74	2.74	0
			Rainfall	<400	12	5	1	0.29	0				pH	>7	18	6	0.98	1.14	0
				>400	23	7	0.89	2.99	0				Soil texture	Light	10	3	0.92	0.5	0
			Temperature	<9	25	10	1	1.89	0					Medium	6	2	0.99	0.02	0
				>9	10	2	0.71	0.68	0					Heavy	17	5	0.78	2.46	0
		WUE	Location	Gansu	14	6	1	0.37	0				N	<50	4	1	0.99	0	0
				Ningxia	5	1	0.19	1.71	41					>50	14	4	0.81	1.57	0
				Shaanxi	10	2	0.33	2.19	9				P	<20	10	3	0.89	0.65	0
				Shanxi	6	1	0.5	0.46	0					>20	12	3	0.87	0.72	0
			Crop type	Maize	23	7	0.69	4.79	0				K	<150	13	3	0.87	0.72	0
				Wheat	2	-	-	-	-					>150	7	2	0.8	0.45	0
				Potato	10	4	0.99	0.35	0			WUE	Organc C content	<9	13	5	1	0.25	0
			Rainfall	<400	12	5	1	0.37	0					>9	13	3	0.33	3.41	12
				>400	23	7	0.68	4.87	0				Bulk density	<1.3	12	4	1	0.17	0
			Temperature	<9	25	10	0.98	3.13	0					>1.3	17	5	0.8	2.38	0
				>9	10	2	0.33	2.19	9				pH	>7	18	6	0.91	2.09	0
													Soil texture	Light	10	3	0.48	2.47	0
														Medium	6	2	0.95	0.11	0
														Heavy	17	5	0.95	2.41	0
													N	<50	4	1	0.86	0.003	0
														>50	14	4	0.62	2.66	0
													P	<20	10	3	0.49	2.43	0
														>20	12	3	0.52	2.28	0
													K	<150	15	4	0.62	2.61	0
														>150	7	2	0.42	1.75	0

## Sheet: Table 3
Treatments	Parameters	Variables	Yield				ET				WUE					Percentages
			n	Mean	Range	CV	n	Mean	Range	CV	n	Mean	Range	CV		Z (Yield)	Z (ET)	Z (WUE)
Plastic film	Location	Gansu	10	8821.61	2162.3 - 45882	150.8	7	279.433	215.4 - 386.5	21.5651	7	33.2742	0.8 - 129.95	137.722		75.6838	-12.6459	68.5265
		Ningxia	2	12925.9	12779.3 - 13072.5	1.60411	2	434.877	375.5 - 494.3	19.3179	2	30.4217	26.8 - 34.1	16.9754		20.183	-0.484568	23.8628
		Shaanxi	7	9313.12	4931.8 - 13079.3	32.6437	3	366.7	300 - 409.5	15.9618	3	25.5222	22 - 32.1	22.2283		12.8987	0.462695	16.1861
		Shanxi	2	11408.3	11290 - 11526.7	1.46692	2	390.567	345.4 - 435.7	16.3545	2	14.915	3.4 - 26.5	109.531		12.7771	-4.03374	12.8499
	Crop type	Maize	13	9813.42	2420 - 13079.3	32.7581	8	392.186	300 - 494.3	14.8117	7	23.8914	3.4 - 34.1	42.2843		24.2753	-1.42952	34.3111
		Wheat	2	3547.05	2162.3 - 4931.8	55.2102	1	272.5	-	-	1	0.7525	-	-		34.3707	-0.201428	34.4951
		Potato	6	11234.6	2359.3 - 45882	152.403	5	259.407	215.4 - 333.7	17.5295	6	38.6944	6.4 - 129.95	123.218		61.4001	-17.1833	41.4269
	Rainfall	<400	8	9532.41	2359.3 - 45882	155.77	6	280.589	215.4 - 386.5	23.4959	6	38.6944	6.4 - 129.96	123.218		72.1355	-14.3741	68.664
		>400	13	9678.24	2162.3 - 13079.3	35.2975	8	377.936	272.5 - 494.3	19.051	8	20.9991	0.8 - 34.1	59.1735		19.3747	-1.06517	18.2928
	Temperature	<9	13	9776.16	2162.3 - 45882	119.109	11	327.902	215.4 - 494.3	27.2962	11	29.4175	0.75 - 129.95	124.531		38.2815	-8.15438	51.378
		>9	8	9660.76	4931.8 - 13079.3	28.693	3	366.7	300 - 409.5	15.9618	3	25.5222	22 - 32.07	22.2283		27.2711	0.462695	16.1861
No mulching	Location	Gansu	10	5021.3	353 - 27385.5	161.892	7	319.886	253.5 - 461.1	26.2394	7	19.7442	0.6 - 79.6	143.757
		Ningxia	2	10755.2	9978.3 - 11532	10.2147	2	436.994	400 - 473.99	11.9711	2	24.5608	24.2 - 24.9	1.93357
		Shaanxi	7	8249.09	4650.4 - 10422.3	27.4998	3	365.011	289.7 - 404	17.8799	3	21.9667	19.5 - 26	16.1535
		Shanxi	2	10115.8	9988.3 - 10243.3	1.78248	2	406.983	380.6 - 433.3	9.15628	2	13.2167	2.7 - 23.7	112.531
	Crop type	Maize	13	7896.52	353 - 11532	44.0223	8	397.873	289.7 - 473.99	13.1339	8	17.7881	0.9 - 26	56.992
		Wheat	2	2639.75	629.1 - 4650.4	107.718	1	273.05	-	-	1	0.5595	-	-
		Potato	6	6960.73	833 - 27385.5	146.926	5	313.23	253.5 - 461.1	29.1896	5	27.36	3.6 - 79.6	112.931
	Rainfall	<400	8	5537.74	353 - 27385.5	163.414	6	327.692	253.5 - 461.1	27.1964	6	22.9417	0.9 - 79.6	129.369
		>400	13	8107.44	629.1 - 11532	38.7196	8	382.005	273.1 - 473.99	17.8856	8	17.7518	0.6 - 26	57.5006
	Temperature	<9	9	7069.75	353 - 27385.5	122.142	11	357.014	253.5 - 474	24.0681	11	19.4331	0.56 - 79.6	117.183
		>9	8	7590.69	4650.4 -10422.3	28.2775	3	365.011	289.7 - 404	17.8799	3	21.9667	19.5 - 26.03	16.1535
Treatments	Parameters	Variables	Yield				ET				WUE					Percentages
			n	Mean	Range	CV	n	Mean	Range	CV	n	Mean	Range	CV		Z (Yield)	Z (ET)	Z (WUE)
Plastic film	Organc C content	<9	8	10503.6	2162.3 - 45882	140.267	6	333.736	215.4 - 494.3	29.1873	6	32.9065	0.75 - 129.95	147.42		57.3217	-10.6784	52.8153
		>9	7	11369.2	9260 - 13079.3	13.2007	4	402.827	375.5 - 435.7	6.44974	4	28.7767	22.5 - 34.07	18.3456		27.8731	-1.67185	22.2415
	Bulk density	<1.3	8	11189.6	2162.3 - 45882	129.462	6	326.547	230.9 - 435.7	23.0596	5	47.5233	6.35 - 129.95	103.153		49.2114	-1.71888	52.8573
		>1.3	9	9399.7	4255.75 - 13072.5	36.6103	6	379.076	259.2 - 494.3	20.3819	6	22.5456	3.36 - 34.07	50.4122		30.2658	-1.70003	24.4408
	pH	>7	11	11728.5	2420 - 45882	101.777	7	380.821	215.4 - 494.3	23.0951	7	36.5314	6.35 - 129.95	115.447		42.7952	-8.638	44.0338
	Soil texture	Light	5	16667.5	2549.8 - 45882	100.879	4	340.085	215.4 - 435.7	27.3634	4	50.5267	11.7 - 129.95	106.407		43.4121	-16.9733	53.3086
		Medium	5	7571.16	2162.3 - 13079.3	57.7675	3	254.183	230.9 - 272.5	8.3693	3	23.3675	0.75 - 52.85	114.343		55.3808	-2.27477	63.7545
		Heavy	10	7938.6	2359.3 - 13072.5	50.0942	6	387.713	300 - 494.3	16.8441	6	18.8417	3.36 - 32.07	60.8264		27.9013	-0.994686	20.6832
	N	<50	4	7221.31	2420 - 13079.3	76.7936	2	300.967	215.4 - 386.5	40.1913	2	8.98333	6.35 - 11.62	41.4556		44.7185	-30.0931	303.745
		>50	6	9935.65	2162.3 - 13072.5	41.6535	5	388.471	272.5 - 494.3	20.4566	5	23.2325	0.75 - 34.07	57.506		30.6284	-0.514835	22.0009
	P	<20	8	9775.44	2420 - 13079.3	40.8808	4	422.997	375.5 - 494.3	12.8287	4	23.415	6.35 - 34.07	50.8552		29.1388	-0.89819	27.0741
		>20	4	7636.66	2162.3 - 12545.3	57.4865	4	343.15	272.5 - 409.5	19.5541	4	19.3298	0.75 - 32.07	68.4061		23.7277	0.330146	16.3403
	K	<150	7	9788.79	4931.8 - 13079.3	31.1955	4	383.958	300 - 435.7	15.3538	5	20.7572	0.75 - 32.07	57.2705		19.2263	0.488539	15.071
		>150	4	20382.1	9794.5 - 45882	83.7223	3	401.151	333.7 - 494.3	20.7684	3	63.5978	26.8 - 129.95	90.5356		50.4827	-1.19742	48.2216
No mulching	Organc C content	<9	8	6676.52	353 - 27385.5	137.288	6	373.634	273.1 - 473.99	22.8516	6	21.5335	0.56 - 79.6	140.392
		>9	7	8891.02	5282 - 10422.3	20.5523	4	409.676	400 - 433	3.87103	4	23.5408	19.5 - 26.03	12.1187
	Bulk density	<1.3	8	7499.14	353 - 27385.5	117.617	6	332.258	253.5 - 433.3	21.9005	5	31.09	0.85 - 79.6	94.2818
		>1.3	9	7215.79	2184.5 - 11532	49.163	6	385.631	253.8 - 473.99	18.7003	6	18.1175	2.7 - 26.03	51.265
	pH	>7	11	8213.52	353 - 27385.5	91.403	7	416.826	344.1 - 473.99	10.4932	7	25.3631	0.85 - 79.6	102.498
	Soil texture	Light	5	11622.1	833 - 27385.5	83.1041	4	409.609	344.1 - 461.1	12.2873	4	32.9575	3.6 - 79.6	98.9024
		Medium	5	4872.65	629 - 8848.5	66.1515	3	260.1	253.5 - 273.1	4.31234	3	14.2698	0.56 - 30.9	107.777
		Heavy	10	6206.82	353 - 11532	65.1656	6	391.609	289.7 - 473.99	15.1578	6	15.6125	0.85 - 26.03	70.465
	N	<50	4	4989.9	353 - 9925.2	102.204	2	430.525	400 - 461.05	10.027	2	2.225	0.85 - 3.6	87.3952
		>50	6	7606.04	629.1 - 11532	53.5945	5	390.481	273.1 - 473.99	18.6241	5	19.0429	0.56 - 26.03	55.8117
	P	<20	8	7569.71	353 - 11532	50.0237	4	426.83	400 - 473.99	8.23383	4	18.4262	0.85 - 24.9	63.644
		>20	4	6172.15	629.1 - 10422.3	67.1429	4	342.021	273.1 - 404	20.5786	4	16.6149	0.56 - 26.03	66.74
	K	<150	7	8210.26	4650.4 - 10422.3	27.1651	4	382.092	289.67 - 433.3	16.566	5	18.0386	0.56 - 26.03	56.0858
		>150	4	13544.5	5282 - 27385.5	70.8944	3	406.013	344.1 - 473.99	16.0526	3	42.9072	24.23 - 79.6	74.0636
